# Supplementary material
Source: publisher figshare collection journal article supplement (https://gsajournals.figshare.com/ndownloader/files/25011737)
Supplement: Supplementary file 1 [file 25011737]

## Sheet: Table S5
Table S5. Gene expression changes between uninjured and injured conditions in +/+, +/Reldel, and Reldel/Reldel flies.
UPREGULATED in injured +/+ vs uninjured +/+							DOWNREGULATED in injured +/+ vs uninjured +/+							UPREGULATED in injured +/Reldel vs uninjured +/Reldel							DOWNREGULATED in injured +/Reldel vs uninjured +/Reldel							UPREGULATED in injured Reldel/Reldel vs uninjured Reldel/Reldel							DOWNREGULATED in injured Reldel/Reldel vs uninjured Reldel/Reldel
Ensembl	Symbol	logFC	PValue	FDR			Ensembl	Symbol	logFC	PValue	FDR			Ensembl	Symbol	logFC	PValue	FDR			Ensembl	Symbol	logFC	PValue	FDR			Ensembl	Symbol	logFC	PValue	FDR			Ensembl	Symbol	logFC	PValue	FDR
FBgn0265577	lncRNA:IBIN	6.11788	3.50353e-24	2.3577e-21			FBgn0267691	CR46027	2.19178	0.00105014	0.0200979			FBgn0051274	CG31274	7.87622	1.57011e-06	0.000115862			FBgn0085291	CR34262	3.95845	6.60009e-05	0.0029415			FBgn0265577	lncRNA:IBIN	8.76907	4.80913e-19	2.40136e-16			FBgn0047000	CG33946	2.50063	3.02095e-07	2.6795e-05
FBgn0037724	Fst	5.68513	1.22199e-15	2.34954e-13			FBgn0028939	NimC2	1.82027	4.3418e-05	0.00140239			FBgn0265577	lncRNA:IBIN	7.16532	6.44646e-17	3.95695e-14			FBgn0267868	lncRNA:CR46156	2.22418	7.82967e-06	0.00046992			FBgn0012042	AttA	6.62691	2.04486e-39	5.51376e-36			FBgn0263406	lncRNA:CR43452	2.44677	3.60339e-08	3.82526e-06
FBgn0035743	Acbp6	5.19572	5.27812e-11	5.63795e-09			FBgn0038525	CG14329	1.78213	0.00012215	0.00334831			FBgn0036951	CG7017	6.73082	1.32518e-11	2.88633e-09			FBgn0267515	28SrRNA-Psi:CR45855	2.19093	2.19674e-07	2.06601e-05			FBgn0010388	Dro	6.55655	1.67702e-21	1.13048e-18			FBgn0032266	CG18302	2.31567	7.99819e-17	2.91437e-14
FBgn0000278	CecB	5.05312	2.24045e-19	7.0126e-17			FBgn0263406	lncRNA:CR43452	1.73081	3.23684e-07	1.82279e-05			FBgn0086265	psd	6.61388	8.78121e-10	1.30309e-07			FBgn0036587	CG4950	2.19037	3.74769e-08	4.11454e-06			FBgn0034328	IM23	6.31375	1.1396e-44	5.12136e-41			FBgn0030148	CG3106	2.12969	0.00111159	0.0305223
FBgn0000279	CecC	4.57196	2.76453e-19	8.45633e-17			FBgn0035282	CNMa	1.58666	4.86484e-09	3.85152e-07			FBgn0037724	Fst	5.76723	4.87141e-40	3.03238e-36			FBgn0267522	28SrRNA-Psi:CR45862	2.12489	4.11499e-07	3.56211e-05			FBgn0036951	CG7017	6.26246	9.30232e-08	9.28992e-06			FBgn0265798	lncRNA:CR44587	1.89067	0.00027748	0.0100835
FBgn0041579	AttC	4.55196	4.91837e-30	9.45662e-27			FBgn0047000	CG33946	1.49081	0.00013625	0.00368973			FBgn0035743	Acbp6	5.2737	1.39571e-19	1.10868e-16			FBgn0267519	28SrRNA-Psi:CR45859	2.06343	1.15766e-06	8.93314e-05			FBgn0014865	Mtk	6.00127	1.07704e-44	5.12136e-41			FBgn0267752	lncRNA:CR46083	1.86646	1.02382e-05	0.000592408
FBgn0052283	Drsl3	4.54336	1.4124e-12	1.88212e-10			FBgn0051205	CG31205	1.49036	5.35294e-13	7.58371e-11			FBgn0004240	DptA	5.14528	6.94393e-13	1.95356e-10			FBgn0085813	18SrRNA-Psi:CR41602	2.02504	2.54318e-06	0.000173218			FBgn0034407	DptB	5.11531	6.05951e-20	3.55193e-17			FBgn0028939	NimC2	1.77175	0.00209746	0.0498881
FBgn0263080	CG43348	4.48995	3.17931e-22	1.64578e-19			FBgn0038398	sxe2	1.47918	8.77846e-15	1.5546e-12			FBgn0031701	TotM	4.75563	5.15737e-16	2.57945e-13			FBgn0267521	18SrRNA-Psi:CR45861	2.00927	2.10742e-07	2.00413e-05			FBgn0031701	TotM	5.08434	3.78336e-22	2.68459e-19			FBgn0038398	sxe2	1.7672	3.45066e-15	1.0819e-12
FBgn0033789	CG13324	4.48797	2.33041e-20	8.71248e-18			FBgn0036587	CG4950	1.45761	6.52178e-06	0.000266798			FBgn0041579	AttC	4.50839	1.92048e-12	5.08513e-10			FBgn0030148	CG3106	1.89409	0.000487167	0.0158142			FBgn0037724	Fst	4.99867	1.46905e-13	3.80879e-11			FBgn0053557	CG33557	1.65121	1.22319e-05	0.000690004
FBgn0031470	CG18557	4.2078	3.97518e-28	4.86382e-25			FBgn0267818	lncRNA:CR46143	1.40348	8.74411e-06	0.000345123			FBgn0031470	CG18557	4.41325	2.89997e-29	5.59446e-26			FBgn0085771	28SrRNA-Psi:CR40741	1.85975	1.03766e-06	8.10714e-05			FBgn0031470	CG18557	4.70585	1.18976e-27	1.33669e-24			FBgn0029167	Hml	1.60805	2.10212e-10	3.0474e-08
FBgn0014865	Mtk	4.16617	5.0937e-27	4.57041e-24			FBgn0266590	lncRNA:CR45115	1.33791	1.71174e-06	8.0836e-05			FBgn0053337	CG33337	4.39605	4.99669e-07	4.27059e-05			FBgn0032896	CG14400	1.84777	0.000310127	0.0109061			FBgn0262838	CG43202	4.65082	6.6742e-20	3.74923e-17			FBgn0265849	lncRNA:CR44638	1.58466	6.04517e-05	0.00280072
FBgn0034407	DptB	4.14743	8.43964e-22	4.05675e-19			FBgn0032266	CG18302	1.31647	1.1836e-06	5.78356e-05			FBgn0000278	CecB	4.29445	2.03521e-10	3.47892e-08			FBgn0035282	CNMa	1.84524	1.15741e-05	0.000667935			FBgn0035743	Acbp6	4.54342	2.0292e-12	4.41253e-10			FBgn0032265	CG18301	1.46735	2.8261e-07	2.52327e-05
FBgn0262838	CG43202	4.1259	4.5487e-25	3.22216e-22			FBgn0038236	Cyp313a1	1.31472	9.36187e-12	1.11506e-09			FBgn0067905	IM14	4.28913	7.45311e-15	3.09219e-12			FBgn0051028	CG31028	1.8328	6.00685e-05	0.00270389			FBgn0035412	CG14957	4.25767	6.30062e-31	1.06181e-27			FBgn0036587	CG4950	1.38576	2.52117e-05	0.00130732
FBgn0034328	IM23	4.09157	3.44651e-14	5.58874e-12			FBgn0036780	CG7330	1.31238	1.24848e-06	6.02269e-05			FBgn0262881	CG43236	4.22899	2.19577e-09	2.98031e-07			FBgn0033366	Ance-4	1.83131	0.000354698	0.0121262			FBgn0033927	CR10102	4.13579	8.53421e-14	2.25604e-11			FBgn0261054	Sfp24Bc	1.38158	0.000171663	0.00674741
FBgn0012042	AttA	3.91642	7.38001e-21	3.10399e-18			FBgn0040102	lectin-24Db	1.30767	0.00025648	0.00619743			FBgn0263080	CG43348	4.18955	9.12321e-22	8.79999e-19			FBgn0085819	28SrRNA-Psi:CR41609	1.81828	2.63986e-06	0.000177357			FBgn0034329	IM1	4.05808	3.86438e-41	1.30249e-37			FBgn0033271	CG8708	1.35465	4.27686e-15	1.31047e-12
FBgn0067905	IM14	3.91005	1.08848e-28	1.62776e-25			FBgn0267457	asRNA:CR45807	1.28691	0.000320742	0.00753379			FBgn0010388	Dro	4.18921	5.54173e-12	1.29027e-09			FBgn0267520	28SrRNA-Psi:CR45860	1.71833	1.68219e-06	0.000122131			FBgn0262881	CG43236	3.98226	4.62016e-09	5.66263e-07			FBgn0040102	lectin-24Db	1.32712	3.90402e-05	0.00189331
FBgn0043578	PGRP-SB1	3.69452	5.62666e-36	3.78646e-32			FBgn0010052	Jhe	1.21778	1.62554e-07	9.94463e-06			FBgn0035412	CG14957	4.11588	1.73176e-29	3.89762e-26			FBgn0028939	NimC2	1.70376	0.000430709	0.0142906			FBgn0052283	Drsl3	3.80414	1.03809e-09	1.33291e-07			FBgn0016675	Lectin-galC1	1.29529	3.69486e-06	0.000246605
FBgn0035921	CG13305	3.58739	1.44172e-20	5.88004e-18			FBgn0030558	CG1461	1.18206	1.31194e-10	1.31772e-08			FBgn0034328	IM23	3.94321	6.67255e-09	8.19147e-07			FBgn0040102	lectin-24Db	1.69857	3.79219e-05	0.0018502			FBgn0041579	AttC	3.71959	1.32897e-10	2.01316e-08			FBgn0039591	CG9988	1.27867	0.00042209	0.0147425
FBgn0002939	ninaD	3.55738	8.04048e-23	4.91895e-20			FBgn0036992	Hpd	1.15102	2.39143e-07	1.39448e-05			FBgn0033789	CG13324	3.8904	7.8046e-28	1.31742e-24			FBgn0031305	Iris	1.68614	0.000244819	0.00887169			FBgn0039593	Sid	3.64594	7.22563e-23	5.73035e-20			FBgn0267818	lncRNA:CR46143	1.2621	0.000765861	0.0225937
FBgn0034160	CG5550	3.49198	6.5887e-10	5.9515e-08			FBgn0086408	stl	1.13216	0.00309169	0.0470713			FBgn0041581	AttB	3.84236	2.27724e-14	8.31132e-12			FBgn0264906	lncRNA:CR44097	1.62914	0.00201374	0.0472932			FBgn0052284	CG32284	3.6208	1.06876e-18	4.96865e-16			FBgn0039930	CG11077	1.2547	7.70109e-07	6.14356e-05
FBgn0010388	Dro	3.4577	4.23442e-14	6.78465e-12			FBgn0261054	Sfp24Bc	1.12107	2.16172e-05	0.000761639			FBgn0036948	CG7298	3.83824	8.87241e-08	9.23734e-06			FBgn0039612	Nepl19	1.61003	8.33608e-06	0.00049373			FBgn0040736	IM3	3.58369	1.11315e-19	5.7721e-17			FBgn0035969	CG4476	1.21735	4.14191e-05	0.00198019
FBgn0031701	TotM	3.42474	7.02064e-07	3.62034e-05			FBgn0085476	CG34447	1.10578	1.11874e-12	1.52092e-10			FBgn0034407	DptB	3.8368	1.51022e-07	1.48164e-05			FBgn0003733	tor	1.57435	0.00156334	0.0388219			FBgn0038299	Spn88Eb	3.57765	9.4858e-51	1.2789e-46			FBgn0051157	CG31157	1.16499	6.73509e-07	5.47003e-05
FBgn0039666	Diedel	3.37661	1.55099e-05	0.00057345			FBgn0033271	CG8708	1.09144	1.79002e-07	1.07553e-05			FBgn0283461	Drs	3.68772	3.6646e-50	4.9487e-46			FBgn0033820	CG4716	1.5583	0.00120259	0.031967			FBgn0032638	SPH93	3.52406	6.10773e-18	2.57326e-15			FBgn0010052	Jhe	1.15606	0.000111123	0.00465268
FBgn0035412	CG14957	3.37413	4.04337e-18	1.04653e-15			FBgn0259918	inaF-B	1.08487	2.32845e-10	2.22259e-08			FBgn0002939	ninaD	3.61563	5.73916e-22	5.96167e-19			FBgn0031261	nAChRbeta3	1.5553	0.000110388	0.00461509			FBgn0036948	CG7298	3.50768	1.91566e-08	2.13446e-06			FBgn0032913	CG9259	1.14991	4.69384e-06	0.000307196
FBgn0036363	CG10140	3.36365	6.52898e-10	5.9374e-08			FBgn0036777	CG7341	1.07165	1.60759e-06	7.61851e-05			FBgn0014865	Mtk	3.45285	2.14673e-12	5.4697e-10			FBgn0267818	lncRNA:CR46143	1.5485	9.59967e-05	0.00410234			FBgn0025583	IM2	3.48728	2.72092e-29	4.07595e-26			FBgn0259229	CG42329	1.11949	1.3495e-06	9.99077e-05
FBgn0039593	Sid	3.35883	9.65925e-28	1.00003e-24			FBgn0265886	lncRNA:CR44675	1.06442	0.000233671	0.00571704			FBgn0052224	asRNA:CR32224	3.39943	0.000340201	0.0117797			FBgn0266428	asRNA:CR43463	1.54355	0.000733912	0.0216865			FBgn0035806	PGRP-SD	3.46215	4.87316e-27	4.69285e-24			FBgn0262896	CG43251	1.11291	9.5233e-05	0.00402746
FBgn0041581	AttB	3.23559	9.93687e-23	5.8148e-20			FBgn0259229	CG42329	1.06351	8.76671e-05	0.00249981			FBgn0012042	AttA	3.39418	1.70606e-08	1.98609e-06			FBgn0040099	lectin-28C	1.53114	7.57314e-06	0.000456552			FBgn0283461	Drs	3.36654	2.24464e-17	8.64634e-15			FBgn0015570	alpha-Est2	1.0833	0.001632	0.0411263
FBgn0034329	IM1	3.22796	1.91736e-33	6.45143e-30			FBgn0031925	Cyp4d21	1.06151	3.64065e-07	2.00994e-05			FBgn0266405	lncRNA:CR45045	3.33289	1.16349e-08	1.40284e-06			FBgn0029147	NtR	1.51753	1.17937e-06	8.99786e-05			FBgn0039091	CG10182	3.3279	6.39818e-10	8.54061e-08			FBgn0036359	CG14105	1.04828	0.00075209	0.0222639
FBgn0034511	GNBP-like3	3.21415	9.19343e-41	1.23734e-36			FBgn0037386	CG1208	1.06052	9.37473e-05	0.00266191			FBgn0035176	CG13905	3.26403	3.42528e-33	1.15637e-29			FBgn0265849	lncRNA:CR44638	1.51432	0.00200938	0.0472932			FBgn0053542	upd3	3.27943	1.28063e-10	1.96199e-08			FBgn0039483	CG14259	1.04787	4.60687e-06	0.000302975
FBgn0034317	CG14499	3.21035	1.13824e-11	1.33213e-09			FBgn0036359	CG14105	1.05089	0.000102372	0.00289458			FBgn0034317	CG14499	3.26198	3.89476e-10	6.26129e-08			FBgn0033065	Cyp6w1	1.5099	2.1285e-05	0.00110841			FBgn0067905	IM14	3.17672	1.72672e-07	1.61664e-05			FBgn0004513	Mdr65	1.04325	8.86984e-07	6.7945e-05
FBgn0052284	CG32284	3.096	1.35493e-16	2.98952e-14			FBgn0040211	hgo	1.05077	3.26372e-07	1.83027e-05			FBgn0035921	CG13305	3.24528	2.89168e-15	1.30164e-12			FBgn0266590	lncRNA:CR45115	1.50962	8.05659e-07	6.59371e-05			FBgn0036563	CG13075	3.15423	9.9701e-29	1.22197e-25			FBgn0038752	CG4462	1.03349	5.68566e-07	4.7027e-05
FBgn0262881	CG43236	3.04193	1.60232e-11	1.8276e-09			FBgn0037835	CG14687	1.0446	1.80572e-13	2.64165e-11			FBgn0010040	GstD4	3.23865	1.47809e-09	2.12342e-07			FBgn0014033	Sr-CI	1.50406	0.000363827	0.0123756			FBgn0034511	GNBP-like3	3.14596	4.52494e-34	1.01675e-30			FBgn0036495	CG33259	1.01812	0.000119926	0.0049144
FBgn0022700	Cht4	2.93831	1.17091e-09	1.00378e-07			FBgn0284233	CG46317	1.043	7.23639e-05	0.00213117			FBgn0010041	GstD5	3.03682	1.92844e-22	2.17014e-19			FBgn0000406	Cyt-b5-r	1.49251	0.00198823	0.0470212			FBgn0034331	CG15067	3.09565	5.12227e-21	3.2885e-18			FBgn0266933	asRNA:CR45384	1.00688	0.000334022	0.011882
FBgn0283461	Drs	2.90862	1.25175e-15	2.37285e-13			FBgn0039612	Nepl19	1.04127	0.0016802	0.0293462			FBgn0043578	PGRP-SB1	2.96213	3.02669e-11	6.19278e-09			FBgn0051823	CG31823	1.46046	2.20309e-07	2.06601e-05			FBgn0263080	CG43348	3.09509	5.45477e-11	9.19265e-09			FBgn0035040	CG4741	1.00269	0.000206489	0.00784191
FBgn0030929	CG15043	2.90642	3.73918e-13	5.41135e-11			FBgn0052072	Elo68alpha	1.03344	4.55115e-07	2.46e-05			FBgn0044812	TotC	2.91578	8.28389e-15	3.29016e-12			FBgn0259229	CG42329	1.43537	0.000213649	0.00808157			FBgn0053470	CG33470	2.91991	8.37797e-20	4.51807e-17
FBgn0035176	CG13905	2.8983	6.33551e-19	1.81425e-16			FBgn0037697	GstZ2	1.01709	6.659e-07	3.44706e-05			FBgn0034160	CG5550	2.88853	5.74037e-11	1.0918e-08			FBgn0261805	CG42751	1.43336	0.00168211	0.041166			FBgn0037850	CG14695	2.89401	2.4044e-26	2.16108e-23
FBgn0037396	CG11459	2.88575	3.36709e-26	2.66575e-23			FBgn0036242	CG6793	1.0129	0.00295138	0.0453454			FBgn0262838	CG43202	2.88516	1.17489e-06	8.99786e-05			FBgn0031182	Cyp6t1	1.43245	0.000341607	0.0117981			FBgn0041581	AttB	2.88649	3.8452e-11	6.7326e-09
FBgn0004240	DptA	2.83602	2.27923e-07	1.33957e-05										FBgn0000277	CecA2	2.82278	2.23188e-05	0.00115035			FBgn0010052	Jhe	1.423	1.51412e-07	1.48164e-05			FBgn0035176	CG13905	2.87134	2.17478e-33	4.18862e-30
FBgn0036767	CG16775	2.78282	1.86381e-11	2.10798e-09										FBgn0053542	upd3	2.8163	1.09633e-10	1.96732e-08			FBgn0261402	Ir75b	1.34735	6.24237e-06	0.000389386			FBgn0267715	asRNA:CR46048	2.79557	0.00152561	0.0394066
FBgn0033788	CG13323	2.73387	1.93657e-14	3.34158e-12										FBgn0013276	Hsp70Ab	2.7972	6.47248e-31	1.74809e-27			FBgn0043791	phu	1.32934	0.000703411	0.0210618			FBgn0013276	Hsp70Ab	2.72065	3.51337e-29	4.73672e-26
FBgn0025583	IM2	2.70206	2.86963e-26	2.4139e-23										FBgn0000279	CecC	2.7642	2.09244e-06	0.000148008			FBgn0030558	CG1461	1.32774	4.73782e-06	0.000305999			FBgn0034160	CG5550	2.71689	1.51129e-06	0.000108379
FBgn0053542	upd3	2.69462	2.40374e-07	1.39448e-05										FBgn0025583	IM2	2.74615	4.24192e-18	2.86415e-15			FBgn0032266	CG18302	1.32603	5.61994e-05	0.0025467			FBgn0040653	IM4	2.70271	3.00637e-27	3.11784e-24
FBgn0035929	CG13311	2.67565	1.14087e-22	6.39789e-20										FBgn0028396	TotA	2.732	3.71824e-18	2.64269e-15			FBgn0039030	CG6660	1.32466	4.08974e-05	0.00195193			FBgn0044812	TotC	2.68784	9.2933e-07	7.07866e-05
FBgn0085456	CG34427	2.62674	6.80071e-06	0.000276528										FBgn0038530	AttD	2.71079	6.02411e-07	5.05277e-05			FBgn0038172	Adgf-D	1.30184	0.0010538	0.0289099			FBgn0004782	Ccp84Ab	2.67369	1.36766e-12	3.02275e-10
FBgn0031033	CG14219	2.62271	4.26921e-07	2.31691e-05										FBgn0040653	IM4	2.69189	1.44665e-27	2.17061e-24			FBgn0284233	CG46317	1.29948	3.61839e-05	0.00177683			FBgn0037396	CG11459	2.66163	2.07962e-18	9.34581e-16
FBgn0034296	CG10912	2.59818	7.01755e-09	5.42812e-07										FBgn0036767	CG16775	2.6675	5.20263e-12	1.23257e-09			FBgn0036359	CG14105	1.28935	0.000167257	0.00649033			FBgn0030904	upd2	2.63344	2.18998e-06	0.000152896
FBgn0052302	CG32302	2.58226	1.97277e-07	1.16967e-05										FBgn0039452	CG14245	2.63156	1.78995e-16	9.2967e-14			FBgn0027073	Ugt49B1	1.27127	0.000180471	0.00688854			FBgn0054054	CG34054	2.50569	3.21423e-11	5.70188e-09
FBgn0040736	IM3	2.57167	6.25866e-28	7.01961e-25										FBgn0034329	IM1	2.60905	7.59642e-11	1.40523e-08			FBgn0031925	Cyp4d21	1.27018	2.71633e-05	0.00136871			FBgn0031959	spz3	2.47511	5.62249e-20	3.44556e-17
FBgn0030310	PGRP-SA	2.55001	4.51216e-31	1.21458e-27										FBgn0036363	CG10140	2.58365	4.45104e-11	8.83924e-09			FBgn0028940	Cyp28a5	1.26819	0.000155565	0.00614254			FBgn0036363	CG10140	2.46839	1.76821e-06	0.000124161
FBgn0085227	CG34198	2.51229	7.60844e-11	7.87708e-09										FBgn0052283	Drsl3	2.53426	2.45302e-05	0.00125476			FBgn0262532	CR43086	1.2524	7.93537e-07	6.5341e-05			FBgn0037801	CG3999	2.42634	1.70545e-15	5.60801e-13
FBgn0032281	CG17107	2.48657	1.88431e-05	0.00067629										FBgn0000079	Amy-p	2.52852	6.6526e-10	1.02087e-07			FBgn0038236	Cyp313a1	1.24912	5.09563e-06	0.00032612			FBgn0033926	Arc1	2.40478	7.70428e-24	6.49182e-21
FBgn0029733	CG6927	2.48092	0.000686242	0.0140367										FBgn0036563	CG13075	2.50384	6.71557e-16	3.23882e-13			FBgn0036777	CG7341	1.22893	2.15063e-06	0.000149701			FBgn0267635	lncRNA:CR45973	2.38423	2.39482e-05	0.0012563
FBgn0033787	CG13321	2.45776	9.17798e-14	1.40371e-11										FBgn0022700	Cht4	2.50373	1.83267e-10	3.17287e-08			FBgn0052750	CG32750	1.22619	2.5617e-05	0.0013005			FBgn0029639	CG14419	2.29997	0.000254545	0.0093509
FBgn0031580	CG15423	2.44611	5.43742e-07	2.86989e-05										FBgn0264295	CG43773	2.48393	0.000145881	0.00586303			FBgn0038398	sxe2	1.21962	8.39909e-08	8.90739e-06			FBgn0083123	Uhg5	2.28533	0.000529002	0.0171856
FBgn0039759	CG9733	2.43796	5.84523e-21	2.53777e-18										FBgn0033788	CG13323	2.47349	1.30323e-16	7.33284e-14			FBgn0032613	Nepl9	1.20421	0.000435261	0.014371			FBgn0033789	CG13324	2.2846	4.1916e-16	1.449e-13
FBgn0028396	TotA	2.40734	4.65342e-06	0.000200097										FBgn0000078	Amy-d	2.46356	2.98015e-09	3.83275e-07			FBgn0040211	hgo	1.20156	1.50677e-05	0.000833909			FBgn0005660	Ets21C	2.25068	1.42832e-16	5.06751e-14
FBgn0053470	CG33470	2.4013	4.251e-12	5.24901e-10										FBgn0039091	CG10182	2.43562	7.49753e-06	0.000454021			FBgn0267969	lncRNA:CR46247	1.20118	0.000831884	0.0240552			FBgn0033593	Listericin	2.23453	2.56533e-10	3.64061e-08
FBgn0000079	Amy-p	2.37975	1.21339e-16	2.72184e-14										FBgn0030929	CG15043	2.43461	1.03456e-16	6.0742e-14			FBgn0029167	Hml	1.20017	0.000129564	0.00530193			FBgn0029766	CG15784	2.22389	7.13381e-15	1.96282e-12
FBgn0000277	CecA2	2.37729	2.15725e-09	1.75966e-07										FBgn0040736	IM3	2.42728	1.66045e-16	8.96908e-14			FBgn0027611	LManII	1.19284	0.000819708	0.0237539			FBgn0264267	asRNA:CR43767	2.21978	1.04751e-05	0.000603527
FBgn0035806	PGRP-SD	2.3703	1.20115e-09	1.02318e-07										FBgn0042086	Tsp42Eb	2.41593	1.1072e-10	1.96732e-08			FBgn0033215	Dgat2	1.18802	0.000556334	0.0177606			FBgn0035921	CG13305	2.2114	1.76292e-07	1.63915e-05
FBgn0039239	CG13641	2.36445	2.62322e-11	2.91784e-09										FBgn0034511	GNBP-like3	2.39179	4.55035e-10	7.22916e-08			FBgn0033775	Cyp9h1	1.15899	0.000439694	0.014482			FBgn0039759	CG9733	2.20736	3.0868e-06	0.000208081
FBgn0042086	Tsp42Eb	2.35875	7.45285e-11	7.7758e-09										FBgn0263081	CG43349	2.34811	6.286e-06	0.000389386			FBgn0051205	CG31205	1.14485	0.00010564	0.00445799			FBgn0002939	ninaD	2.19643	3.32741e-09	4.19254e-07
FBgn0266405	lncRNA:CR45045	2.35858	8.0775e-07	4.10246e-05										FBgn0029766	CG15784	2.32896	6.73663e-40	3.03238e-36			FBgn0259896	NimC1	1.14304	0.0010628	0.0290528			FBgn0033592	CG13215	2.19139	7.74464e-11	1.24302e-08
FBgn0039091	CG10182	2.33851	0.00313893	0.047629										FBgn0030310	PGRP-SA	2.32212	3.31137e-24	4.47167e-21			FBgn0015038	Cyp9b1	1.12181	0.000848277	0.0244246			FBgn0028396	TotA	2.16674	6.56206e-09	7.82918e-07
FBgn0034331	CG15067	2.28783	2.68507e-14	4.51729e-12										FBgn0034331	CG15067	2.29466	1.7968e-14	6.74e-12			FBgn0036992	Hpd	1.12161	0.000178614	0.00685228			FBgn0010041	GstD5	2.15914	2.43342e-05	0.00126952
FBgn0029766	CG15784	2.2523	4.65394e-20	1.64835e-17										FBgn0044810	TotX	2.26639	1.9427e-09	2.67696e-07			FBgn0032382	Mal-B2	1.10687	0.00207939	0.0482476			FBgn0261989	CG42807	2.13269	1.24028e-12	2.83414e-10
FBgn0040653	IM4	2.23991	1.23116e-13	1.84113e-11										FBgn0010385	Def	2.26396	1.21434e-05	0.000680431			FBgn0040260	Ugt37D1	1.1062	0.00120077	0.031967			FBgn0034758	CG13510	2.13125	1.34417e-12	3.02035e-10
FBgn0000078	Amy-d	2.23855	9.43443e-06	0.000370198										FBgn0033207	CG12826	2.25121	1.30589e-07	1.30628e-05			FBgn0052191	CG32191	1.0837	0.00213627	0.0489782			FBgn0027584	CG4757	2.12578	6.84988e-06	0.000423625
FBgn0038299	Spn88Eb	2.22247	6.21987e-18	1.57949e-15										FBgn0085227	CG34198	2.23486	9.50886e-10	1.39574e-07			FBgn0032253	LManI	1.08342	0.000890691	0.0254828			FBgn0038214	CG9616	2.11364	0.000266079	0.0097216
FBgn0033124	Tsp42Ec	2.20252	2.81487e-05	0.0009567										FBgn0266431	CG45061	2.23168	2.83028e-07	2.56511e-05			FBgn0039073	CG4408	1.08227	0.00020718	0.00785886			FBgn0010222	Nmdmc	2.10339	5.62273e-18	2.44534e-15
FBgn0036948	CG7298	2.19277	3.76828e-06	0.000165203										FBgn0033787	CG13321	2.22323	1.31587e-10	2.30773e-08			FBgn0002922	nau	1.07967	4.7101e-05	0.00220087			FBgn0040734	CG15065	2.08895	2.57042e-11	4.75107e-09
FBgn0031560	CG16713	2.1879	3.47766e-34	1.5602e-30										FBgn0034296	CG10912	2.21713	9.20785e-11	1.68031e-08			FBgn0030593	CG9512	1.07249	0.00100498	0.0280978			FBgn0034296	CG10912	2.06911	2.4448e-10	3.50647e-08
FBgn0036419	CG13482	2.17439	5.41431e-08	3.60749e-06										FBgn0010038	GstD2	2.1988	4.81301e-14	1.51151e-11			FBgn0085476	CG34447	1.06933	3.97961e-05	0.00192619			FBgn0033880	CG6553	2.06682	6.18509e-06	0.000386053
FBgn0032087	CG9568	2.16446	3.84152e-06	0.000167867										FBgn0040723	CG5011	2.19033	5.20218e-11	1.01595e-08			FBgn0262533	CR43087	1.06857	0.000221807	0.00834341			FBgn0030310	PGRP-SA	2.06391	7.38331e-10	9.66425e-08
FBgn0040723	CG5011	2.15421	1.48269e-07	9.15388e-06										FBgn0039593	Sid	2.17388	3.8359e-05	0.00186331			FBgn0004513	Mdr65	1.06761	8.48291e-06	0.000498057			FBgn0032639	CG18563	2.05726	2.8429e-05	0.00144634
FBgn0035661	CG10477	2.15348	0.000117599	0.00326342										FBgn0004426	LysC	2.16669	3.41112e-05	0.00168116			FBgn0036780	CG7330	1.06664	0.000123788	0.00511203			FBgn0030993	Mec2	2.0467	9.25039e-11	1.46722e-08
FBgn0004782	Ccp84Ab	2.14935	5.3028e-07	2.80986e-05										FBgn0052302	CG32302	2.15435	2.03399e-05	0.00107293			FBgn0032265	CG18301	1.06645	4.8876e-07	4.20396e-05			FBgn0262895	lncRNA:CR43250	2.04593	5.01576e-07	4.17423e-05
FBgn0038530	AttD	2.12784	0.000593803	0.0124486										FBgn0039759	CG9733	2.1357	3.74649e-09	4.77289e-07			FBgn0001208	Hn	1.05486	4.75559e-05	0.00221446			FBgn0033788	CG13323	2.02883	1.20609e-10	1.86902e-08
FBgn0013276	Hsp70Ab	2.11695	1.76439e-14	3.08401e-12										FBgn0052198	CG32198	2.1284	9.22385e-05	0.00396684			FBgn0039483	CG14259	1.0497	6.23313e-05	0.00278716			FBgn0029831	CG5966	2.01728	2.28153e-15	7.3237e-13
FBgn0051086	CG31086	2.10321	0.000822999	0.0164891										FBgn0037850	CG14695	2.12402	8.2116e-21	6.93059e-18			FBgn0031209	Ir21a	1.04551	0.000454651	0.0149382			FBgn0031973	Spn28Dc	2.00011	1.69571e-10	2.51227e-08
FBgn0050091	CG30091	2.10146	0.00310713	0.0472529										FBgn0085205	CG34176	2.12097	1.19684e-06	9.02912e-05			FBgn0052072	Elo68alpha	1.04498	1.83509e-05	0.000979486			FBgn0053468	CG33468	1.98197	5.62363e-13	1.33014e-10
FBgn0044812	TotC	2.08796	0.00292316	0.0451179										FBgn0032839	AANATL3	2.11506	0.000376303	0.0127358			FBgn0037765	CG9458	1.04169	0.00149082	0.0374201			FBgn0034276	Sardh	1.9797	1.38875e-06	0.000101711
FBgn0054043	CG34043	2.07533	1.90443e-16	4.13415e-14										FBgn0028983	Spn55B	2.10645	7.97351e-24	9.78857e-21			FBgn0032652	CG6870	1.03874	0.00011246	0.00468723			FBgn0030929	CG15043	1.94572	8.20153e-05	0.00356687
FBgn0028855	CG15282	2.07156	2.2061e-11	2.47433e-09										FBgn0034880	ItgaPS5	2.08537	7.07775e-05	0.0031337			FBgn0037763	CG16904	1.02715	0.000124639	0.00513146			FBgn0032587	CG5953	1.90699	7.3528e-18	3.00395e-15
FBgn0030928	CG15044	2.06887	0.000457774	0.0101003										FBgn0036419	CG13482	2.07429	7.47626e-10	1.13438e-07			FBgn0036619	Cpr72Ec	1.02399	0.000152555	0.00609499			FBgn0032805	CG10337	1.90173	8.84367e-12	1.83431e-09
FBgn0033301	CG12780	2.05962	1.16079e-16	2.64797e-14										FBgn0005660	Ets21C	2.06096	2.40259e-17	1.54498e-14			FBgn0040259	Ugt302C1	1.02182	0.000159827	0.00629244			FBgn0027929	NimB1	1.89796	6.35002e-09	7.64384e-07
FBgn0028983	Spn55B	2.05768	5.67146e-23	3.63487e-20										FBgn0002563	Lsp1beta	2.06003	5.47045e-06	0.000346821			FBgn0040322	GNBP2	1.02066	0.000752285	0.0221326			FBgn0040735	CG16836	1.89127	1.59269e-09	2.02573e-07
FBgn0053346	CG33346	2.052	0.000314919	0.00746213										FBgn0033308	CG8736	2.0549	2.13964e-05	0.00110841			FBgn0043792	CG30427	1.01545	3.43336e-10	5.58603e-08			FBgn0044810	TotX	1.86034	2.2608e-11	4.29297e-09
FBgn0003961	Uro	2.04141	2.13942e-19	6.85583e-17										FBgn0030928	CG15044	2.02183	6.90873e-06	0.000422152										FBgn0264753	Rgk1	1.85585	1.28066e-22	9.59216e-20
FBgn0010385	Def	2.03401	1.5874e-08	1.15486e-06										FBgn0035806	PGRP-SD	2.01885	4.88731e-08	5.27986e-06										FBgn0028841	jhamt	1.84461	7.12589e-10	9.41875e-08
FBgn0039452	CG14245	2.03189	9.30506e-10	8.07979e-08										FBgn0035929	CG13311	2.0187	5.06024e-15	2.2043e-12										FBgn0052302	CG32302	1.84329	7.74954e-06	0.000471102
FBgn0044810	TotX	2.02815	0.000117137	0.00325952										FBgn0031959	spz3	2.00075	7.1122e-11	1.33393e-08										FBgn0262622	lncRNA:CR43146	1.83371	7.10131e-05	0.00319133
FBgn0030994	HP1D3csd	2.02598	0.000585976	0.0123229										FBgn0031756	CG13992	1.99275	1.1965e-06	9.02912e-05										FBgn0034512	CG18067	1.83016	4.44207e-11	7.67795e-09
FBgn0265185	CG44250	2.02405	1.23103e-08	9.15386e-07										FBgn0034758	CG13510	1.97178	3.3602e-21	3.02508e-18										FBgn0085294	CG34265	1.82879	0.000741798	0.0220285
FBgn0039453	CG6403	2.02342	0.00105126	0.0200979										FBgn0032638	SPH93	1.95829	0.000696458	0.0209947										FBgn0039239	CG13641	1.82656	7.75735e-06	0.000471102
FBgn0010040	GstD4	2.01698	4.98262e-06	0.000212219										FBgn0025692	Lfg	1.94344	3.41205e-12	8.22791e-10										FBgn0040582	CG5791	1.82266	6.7162e-15	1.88641e-12
FBgn0010043	GstD7	2.00342	1.22026e-06	5.90775e-05										FBgn0028738	ETH	1.94202	0.000499934	0.016151										FBgn0035623	mthl2	1.80758	4.2722e-07	3.66865e-05
FBgn0263235	Phae2	1.99416	4.17895e-08	2.84063e-06										FBgn0052284	CG32284	1.91886	3.68692e-13	1.05932e-10										FBgn0028983	Spn55B	1.80692	9.66002e-11	1.51438e-08
FBgn0030688	CG8952	1.99413	7.97051e-14	1.23305e-11										FBgn0054043	CG34043	1.91637	1.08829e-14	4.19892e-12										FBgn0054043	CG34043	1.80545	2.45756e-12	5.25917e-10
FBgn0032669	CG15155	1.98996	1.46736e-25	1.09717e-22										FBgn0030904	upd2	1.91543	6.97422e-05	0.00309802										FBgn0053258	CG33258	1.79111	9.7721e-18	3.87493e-15
FBgn0037850	CG14695	1.98374	3.11334e-08	2.17111e-06										FBgn0265185	CG44250	1.89835	1.64962e-09	2.34489e-07										FBgn0013279	Hsp70Bc	1.78672	7.02805e-09	8.23932e-07
FBgn0033593	Listericin	1.98168	2.04804e-28	2.75646e-25										FBgn0040734	CG15065	1.88277	7.75192e-08	8.30809e-06										FBgn0010038	GstD2	1.77679	9.52731e-06	0.000560905
FBgn0053192	MtnD	1.96961	3.57393e-07	1.98767e-05										FBgn0263235	Phae2	1.86554	7.38192e-13	2.0344e-10										FBgn0264549	lncRNA:CR43928	1.77537	4.29753e-06	0.000284016
FBgn0266488	CG45087	1.9686	2.1462e-20	8.26951e-18										FBgn0020765	Acp65Aa	1.86095	0.000558956	0.0178022										FBgn0051354	Hsp70Bbb	1.7675	9.50425e-12	1.90586e-09
FBgn0003067	Pepck1	1.9686	2.15048e-20	8.26951e-18										FBgn0029831	CG5966	1.82485	3.1112e-12	7.78029e-10										FBgn0031034	CG14205	1.743	0.000430725	0.0149281
FBgn0010041	GstD5	1.9467	2.16827e-10	2.1147e-08										FBgn0033926	Arc1	1.80396	1.3496e-15	6.28448e-13										FBgn0043578	PGRP-SB1	1.71448	2.56631e-06	0.00017563
FBgn0040735	CG16836	1.92618	3.64053e-18	9.60744e-16										FBgn0028841	jhamt	1.79624	8.44302e-08	8.90739e-06										FBgn0003067	Pepck1	1.7047	2.59708e-13	6.36614e-11
FBgn0032638	SPH93	1.91801	1.90616e-07	1.13518e-05										FBgn0053470	CG33470	1.79522	4.48832e-06	0.000292803										FBgn0266488	CG45087	1.7047	2.5931e-13	6.36614e-11
FBgn0051041	CG31041	1.90662	0.000421355	0.00938911										FBgn0004782	Ccp84Ab	1.7811	8.33041e-07	6.77674e-05										FBgn0034295	CG10911	1.69283	8.85124e-06	0.000525694
FBgn0036110	Cpr67Fb	1.90314	4.10898e-12	5.12063e-10										FBgn0085356	CG34327	1.77842	9.33654e-05	0.00400256										FBgn0025692	Lfg	1.69219	1.63302e-07	1.56145e-05
FBgn0010038	GstD2	1.89824	2.45436e-10	2.32629e-08										FBgn0051354	Hsp70Bbb	1.77107	2.4229e-14	8.61024e-12										FBgn0041184	Socs36E	1.68664	5.45895e-16	1.83994e-13
FBgn0034647	pirk	1.89068	8.29849e-11	8.5259e-09										FBgn0040735	CG16836	1.76599	4.99183e-10	7.83833e-08										FBgn0035439	CG14961	1.67764	5.74312e-07	4.72126e-05
FBgn0033592	CG13215	1.87521	7.00778e-06	0.00028409										FBgn0003067	Pepck1	1.75712	4.1635e-14	1.38498e-11										FBgn0038930	CG5778	1.67034	2.14196e-13	5.44865e-11
FBgn0261989	CG42807	1.87095	1.0851e-11	1.28109e-09										FBgn0266488	CG45087	1.75712	4.205e-14	1.38498e-11										FBgn0261560	Thor	1.6689	9.6127e-12	1.90586e-09
FBgn0005660	Ets21C	1.86606	2.63133e-16	5.5336e-14										FBgn0032283	CG7296	1.7442	0.000162719	0.00638765										FBgn0039564	Nep7	1.66866	2.79309e-08	3.06828e-06
FBgn0025692	Lfg	1.86026	8.81666e-10	7.8068e-08										FBgn0032087	CG9568	1.73465	1.38358e-06	0.000103226										FBgn0033928	Arc2	1.63888	1.77159e-10	2.59614e-08
FBgn0031579	CG15422	1.84788	5.16989e-05	0.00159957										FBgn0035281	Cpr62Bc	1.73419	4.37168e-05	0.00204983										FBgn0039629	CG11842	1.63834	3.47334e-13	8.36206e-11
FBgn0265186	CG44251	1.82885	0.000102739	0.00289888										FBgn0011296	l(2)efl	1.72444	1.60049e-11	3.43064e-09										FBgn0286785	scb	1.63237	7.45099e-19	3.58765e-16
FBgn0031959	spz3	1.82253	2.78941e-22	1.5017e-19										FBgn0261989	CG42807	1.71698	2.5485e-08	2.89201e-06										FBgn0002930	nec	1.62508	6.36999e-15	1.82724e-12
FBgn0010222	Nmdmc	1.81911	1.00704e-21	4.51791e-19										FBgn0036110	Cpr67Fb	1.70312	5.85688e-12	1.34053e-09										FBgn0085205	CG34176	1.62336	0.000498392	0.0165094
FBgn0033294	Mal-A4	1.79515	3.00467e-05	0.00100729										FBgn0031580	CG15423	1.69121	0.000696702	0.0209947										FBgn0035929	CG13311	1.60692	3.55083e-08	3.79939e-06
FBgn0036563	CG13075	1.79035	1.76565e-07	1.07044e-05										FBgn0033593	Listericin	1.68189	3.89058e-11	7.84156e-09										FBgn0050026	CG30026	1.60187	1.44975e-07	1.41634e-05
FBgn0033297	Mal-A8	1.789	0.00179731	0.0306885										FBgn0039239	CG13641	1.6708	2.54764e-05	0.00129824										FBgn0266431	CG45061	1.59606	3.5312e-05	0.00174387
FBgn0040582	CG5791	1.78692	2.68451e-29	4.51635e-26										FBgn0036024	CG18180	1.6637	0.000749237	0.022091										FBgn0033397	Cyp4p3	1.5944	7.86562e-13	1.82835e-10
FBgn0050360	Mal-A6	1.78126	0.0001933	0.00489028										FBgn0031034	CG14205	1.65271	4.99708e-05	0.00231098										FBgn0034741	CG4269	1.59241	3.72158e-07	3.25807e-05
FBgn0034293	CG14495	1.77826	8.37836e-05	0.00239415										FBgn0010222	Nmdmc	1.64794	4.54576e-14	1.46157e-11										FBgn0004635	rho	1.56407	4.03822e-09	4.99479e-07
FBgn0034758	CG13510	1.76828	9.79593e-19	2.69068e-16										FBgn0028544	Vajk3	1.63246	1.18737e-05	0.000679419										FBgn0259708	CG42362	1.56246	5.7028e-11	9.37624e-09
FBgn0029831	CG5966	1.75539	8.8788e-22	4.12068e-19										FBgn0033301	CG12780	1.62872	5.26632e-11	1.01595e-08										FBgn0259709	CG42363	1.56246	5.69446e-11	9.37624e-09
FBgn0032805	CG10337	1.73108	3.72632e-10	3.43511e-08										FBgn0039480	Cpr97Ea	1.62861	0.000384878	0.0129321										FBgn0054003	NimB3	1.56187	0.00011464	0.00478505
FBgn0037801	CG3999	1.72527	1.22138e-07	7.64582e-06										FBgn0035583	CG13704	1.58291	3.5551e-07	3.13778e-05										FBgn0265702	asRNA:CR44509	1.55218	1.41825e-07	1.39568e-05
FBgn0034295	CG10911	1.72378	4.45282e-05	0.00142854										FBgn0050360	Mal-A6	1.57191	0.000475919	0.0155237										FBgn0011722	Tig	1.54775	7.28045e-11	1.18259e-08
FBgn0259237	CG42335	1.7227	2.33637e-06	0.000107466										FBgn0034741	CG4269	1.57189	3.25752e-12	7.9981e-10										FBgn0025879	Timp	1.53895	6.47502e-17	2.42489e-14
FBgn0036766	CG5506	1.71679	3.12673e-11	3.4494e-09										FBgn0041184	Socs36E	1.5651	5.42879e-14	1.66614e-11										FBgn0053265	Muc68E	1.52826	4.98432e-05	0.0023496
FBgn0267635	lncRNA:CR45973	1.71495	0.000559889	0.0118297										FBgn0038595	CG7142	1.56492	1.57653e-05	0.00086896										FBgn0260632	dl	1.52655	6.18692e-15	1.8133e-12
FBgn0034289	CG10910	1.71404	4.26509e-06	0.000183987										FBgn0032805	CG10337	1.5476	1.05903e-08	1.28839e-06										FBgn0034517	Cpr57A	1.5038	3.24687e-05	0.00161529
FBgn0040104	lectin-24A	1.69907	0.00115478	0.0216164										FBgn0054054	CG34054	1.53842	1.61585e-06	0.000118589										FBgn0022700	Cht4	1.50312	7.79442e-07	6.18143e-05
FBgn0262146	MtnE	1.68205	7.3053e-05	0.00214209										FBgn0013278	Hsp70Bb	1.53795	2.85086e-10	4.75284e-08										FBgn0033153	Gadd45	1.49481	4.53288e-10	6.30024e-08
FBgn0024897	b6	1.67644	3.41955e-09	2.7233e-07										FBgn0033592	CG13215	1.53206	3.85037e-06	0.000253636										FBgn0024897	b6	1.49417	4.03351e-06	0.000267881
FBgn0040734	CG15065	1.67314	6.45109e-13	9.0443e-11										FBgn0032538	Vajk2	1.52417	1.20597e-05	0.000680431										FBgn0037819	CG14688	1.47479	2.38757e-14	6.43785e-12
FBgn0024361	Tsp2A	1.66453	7.19552e-07	3.69635e-05										FBgn0033234	MFS12	1.52354	7.36451e-12	1.6575e-09										FBgn0040972	CG16978	1.47368	1.12353e-08	1.27289e-06
FBgn0034741	CG4269	1.65067	3.40298e-16	6.83592e-14										FBgn0032669	CG15155	1.52257	9.18198e-14	2.75541e-11										FBgn0262656	Myc	1.46821	8.85749e-07	6.7945e-05
FBgn0035583	CG13704	1.64934	6.28837e-08	4.14878e-06										FBgn0003062	Fib	1.52086	9.29291e-07	7.46973e-05										FBgn0033301	CG12780	1.46278	8.09968e-05	0.00353398
FBgn0035313	CG13810	1.64202	0.00062013	0.0129401										FBgn0265186	CG44251	1.51285	0.000578321	0.0182896										FBgn0264987	lncRNA:CR44138	1.44315	0.00184552	0.0452386
FBgn0262141	CG42867	1.63691	0.00148356	0.0264467										FBgn0037396	CG11459	1.51224	0.00140151	0.0355084										FBgn0003961	Uro	1.44232	5.91734e-10	7.97776e-08
FBgn0033051	Strica	1.62026	2.33951e-06	0.000107466										FBgn0053192	MtnD	1.5093	5.19278e-05	0.00237706										FBgn0013278	Hsp70Bb	1.43364	1.43288e-10	2.14645e-08
FBgn0033234	MFS12	1.61872	3.25251e-09	2.62129e-07										FBgn0004425	LysB	1.50597	0.000311348	0.0109206										FBgn0052107	CG32107	1.41856	0.00129178	0.0342831
FBgn0054054	CG34054	1.59105	2.96494e-08	2.07839e-06										FBgn0037819	CG14688	1.50307	3.64441e-14	1.2619e-11										FBgn0034396	CG15097	1.40643	8.70444e-09	9.94519e-07
FBgn0051087	CG31087	1.58845	3.60802e-05	0.00118729										FBgn0013279	Hsp70Bc	1.49385	1.56118e-08	1.84052e-06										FBgn0086347	Myo31DF	1.39764	5.87018e-15	1.75871e-12
FBgn0264753	Rgk1	1.58552	1.12647e-30	2.52687e-27										FBgn0034647	pirk	1.48967	2.06774e-07	1.98033e-05										FBgn0032773	fon	1.39075	5.56152e-10	7.57377e-08
FBgn0034582	Cht9	1.57945	8.77538e-07	4.40701e-05										FBgn0054003	NimB3	1.47292	1.034e-06	8.10714e-05										FBgn0039452	CG14245	1.38255	0.000125808	0.00513984
FBgn0038595	CG7142	1.57873	0.000489121	0.0106008										FBgn0031560	CG16713	1.46446	5.21393e-10	8.09298e-08										FBgn0011296	l(2)efl	1.38016	1.35288e-11	2.64341e-09
FBgn0286786	hoip	1.56573	3.40418e-14	5.58742e-12										FBgn0014454	Acp1	1.46178	9.68364e-05	0.00410508										FBgn0266376	lncRNA:CR45018	1.36508	1.39567e-06	0.000101711
FBgn0037906	PGRP-LB	1.55889	2.83445e-14	4.70973e-12										FBgn0286786	hoip	1.4604	1.46485e-09	2.12342e-07										FBgn0286827	lncRNA:CR43334	1.35098	0.000186436	0.00724358
FBgn0038353	CG5399	1.55537	7.97115e-09	6.06123e-07										FBgn0033928	Arc2	1.45514	2.02595e-11	4.27475e-09										FBgn0036419	CG13482	1.34705	0.00170017	0.0424975
FBgn0002570	Mal-A1	1.55419	0.00308447	0.0470145										FBgn0034294	Muc55B	1.45387	0.00156782	0.0388475										FBgn0033873	CG6337	1.34471	2.57952e-05	0.00132737
FBgn0032587	CG5953	1.54876	2.94633e-17	7.20994e-15										FBgn0034582	Cht9	1.45186	5.34242e-09	6.68e-07										FBgn0031558	CG16704	1.33379	2.93172e-05	0.00148592
FBgn0262608	CG43134	1.54553	0.000300147	0.00715633										FBgn0032587	CG5953	1.44892	1.29762e-12	3.50461e-10										FBgn0031560	CG16713	1.32707	9.9545e-06	0.000580981
FBgn0041184	Socs36E	1.53719	2.49004e-16	5.31959e-14										FBgn0037906	PGRP-LB	1.44103	2.20698e-09	2.98031e-07										FBgn0033443	CG1698	1.32218	2.10348e-05	0.0011165
FBgn0033926	Arc1	1.53167	7.42694e-15	1.33279e-12										FBgn0052054	CG32054	1.43594	0.00165158	0.0405509										FBgn0032140	CG13117	1.31986	3.24904e-08	3.53254e-06
FBgn0263081	CG43349	1.52522	0.000390979	0.00891896										FBgn0036738	CG7542	1.43125	0.000166186	0.00647326										FBgn0261258	rgn	1.31889	8.39477e-09	9.75675e-07
FBgn0035544	CG15021	1.5234	3.49246e-20	1.2704e-17										FBgn0003961	Uro	1.41008	7.55644e-15	3.09219e-12										FBgn0028543	NimB2	1.31737	7.86669e-07	6.20226e-05
FBgn0043575	PGRP-SC2	1.52289	0.00017166	0.00442227										FBgn0031940	CG7214	1.39965	0.000433611	0.0143517										FBgn0039241	CG11089	1.30553	2.43484e-07	2.18843e-05
FBgn0262007	CG42825	1.51569	0.000169326	0.00439106										FBgn0034005	ItgaPS4	1.38845	0.00068794	0.0208295										FBgn0008636	hbn	1.30382	0.00173029	0.0428819
FBgn0267339	p38c	1.48895	6.49752e-05	0.00195201										FBgn0040582	CG5791	1.38396	1.98654e-08	2.29284e-06										FBgn0035049	Mmp1	1.30216	2.57253e-11	4.75107e-09
FBgn0053265	Muc68E	1.48849	0.00206028	0.0341073										FBgn0034709	Swim	1.38324	1.65743e-19	1.24344e-16										FBgn0000083	AnxB9	1.30179	9.32793e-12	1.90544e-09
FBgn0033659	Damm	1.47096	0.000225195	0.00554198										FBgn0038930	CG5778	1.37648	1.75435e-09	2.46779e-07										FBgn0053329	Sp212	1.29743	5.97022e-06	0.00037789
FBgn0266431	CG45061	1.47087	0.00160203	0.0281853										FBgn0029639	CG14419	1.36845	1.09889e-07	1.1242e-05										FBgn0028990	Spn27A	1.29561	3.45774e-09	4.31642e-07
FBgn0030040	CG15347	1.46281	3.29908e-06	0.00014606										FBgn0024361	Tsp2A	1.36035	0.000223807	0.00839524										FBgn0000079	Amy-p	1.29257	0.00153667	0.0394066
FBgn0031756	CG13992	1.45325	0.000136759	0.00369607										FBgn0035544	CG15021	1.35867	3.39982e-10	5.58603e-08										FBgn0262717	Skeletor	1.29241	3.02655e-11	5.44053e-09
FBgn0031010	CG8028	1.44312	1.58991e-07	9.77105e-06										FBgn0004427	LysD	1.35777	0.0001541	0.00613853										FBgn0038250	CG3505	1.29035	2.25819e-07	2.04329e-05
FBgn0051004	mesh	1.43099	2.83957e-05	0.000962664										FBgn0024897	b6	1.34485	2.51044e-07	2.30619e-05										FBgn0046685	Wsck	1.28407	9.24723e-10	1.19876e-07
FBgn0051354	Hsp70Bbb	1.42239	4.24228e-10	3.88414e-08										FBgn0030040	CG15347	1.32679	3.7952e-05	0.0018502										FBgn0030309	CG1572	1.28126	2.91216e-11	5.30565e-09
FBgn0266791	lncRNA:CR45256	1.41325	3.19203e-08	2.21451e-06										FBgn0000153	b	1.3211	1.83618e-09	2.55626e-07										FBgn0034759	CG13511	1.27914	0.00098184	0.0277509
FBgn0031561	IM33	1.41316	1.12118e-18	3.01798e-16										FBgn0046999	CG6429	1.31326	2.10438e-06	0.000148008										FBgn0000636	Fas3	1.2713	4.01832e-10	5.64322e-08
FBgn0041182	Tep2	1.40168	3.1998e-16	6.52517e-14										FBgn0034289	CG10910	1.3129	1.4924e-05	0.000829354										FBgn0041182	Tep2	1.25963	1.77337e-11	3.41552e-09
FBgn0032283	CG7296	1.39341	0.000390933	0.00891896										FBgn0000083	AnxB9	1.30964	2.13416e-13	6.26516e-11										FBgn0035089	Phk-3	1.24429	3.67162e-08	3.86725e-06
FBgn0033999	CG8093	1.39092	0.00073218	0.0148187										FBgn0034356	Pepck2	1.28718	8.28892e-06	0.0004931										FBgn0243512	puc	1.24324	7.74361e-08	7.96941e-06
FBgn0053468	CG33468	1.38358	0.000120744	0.0033233										FBgn0266791	lncRNA:CR45256	1.28088	4.7172e-06	0.000305999										FBgn0053696	CNMaR	1.23761	0.000737626	0.0219529
FBgn0033928	Arc2	1.37937	1.2673e-09	1.07274e-07										FBgn0000047	Act88F	1.2803	0.00035072	0.0120512										FBgn0020513	Paics	1.23257	2.79928e-08	3.06828e-06
FBgn0085455	CG34426	1.37813	8.63217e-13	1.19774e-10										FBgn0264753	Rgk1	1.28011	1.18162e-11	2.61583e-09										FBgn0085452	CG34423	1.23099	0.00127387	0.0340083
FBgn0028841	jhamt	1.36993	1.6797e-08	1.20894e-06										FBgn0034471	Obp56e	1.27244	7.83327e-10	1.17534e-07										FBgn0030688	CG8952	1.23044	1.6926e-08	1.90164e-06
FBgn0011296	l(2)efl	1.36904	7.22267e-19	2.02521e-16										FBgn0031010	CG8028	1.24035	1.38177e-06	0.000103226										FBgn0033388	CG8046	1.22605	0.000701043	0.0213467
FBgn0052023	CG32023	1.36836	1.38326e-17	3.44764e-15										FBgn0259708	CG42362	1.23453	4.31836e-05	0.00203737										FBgn0034709	Swim	1.22359	3.25154e-12	6.84958e-10
FBgn0020513	Paics	1.36409	8.78921e-08	5.71469e-06										FBgn0259709	CG42363	1.23453	4.33001e-05	0.00203737										FBgn0037796	CG12814	1.21824	6.67637e-09	7.89569e-07
FBgn0265702	asRNA:CR44509	1.35947	1.48041e-11	1.70298e-09										FBgn0035089	Phk-3	1.23011	2.00732e-12	5.21284e-10										FBgn0020416	Idgf1	1.21663	8.73569e-08	8.85523e-06
FBgn0031034	CG14205	1.35738	0.000706171	0.014357										FBgn0035325	CG13806	1.21002	0.00209815	0.048516										FBgn0033234	MFS12	1.2118	8.75874e-07	6.78652e-05
FBgn0054003	NimB3	1.35491	1.36272e-05	0.000518101										FBgn0000527	e	1.20869	1.56738e-08	1.84052e-06										FBgn0035379	spz5	1.21161	2.04726e-05	0.00109096
FBgn0052557	Mco4	1.34973	0.00323135	0.0487019										FBgn0267339	p38c	1.20791	0.00103787	0.0286613										FBgn0005659	Ets98B	1.2079	4.17396e-07	3.60726e-05
FBgn0264776	CG44014	1.34193	1.21467e-07	7.63937e-06										FBgn0033807	AQP	1.20082	0.0001732	0.00668254										FBgn0035544	CG15021	1.20772	7.26163e-07	5.82745e-05
FBgn0000153	b	1.33068	4.25477e-19	1.24489e-16										FBgn0085425	CG34396	1.19887	2.33599e-11	4.85311e-09										FBgn0002562	Lsp1alpha	1.20692	0.000128075	0.00518529
FBgn0011703	RnrL	1.32647	0.00186396	0.0313851										FBgn0265702	asRNA:CR44509	1.19762	1.6488e-06	0.000120354										FBgn0039411	dysf	1.20602	4.92391e-07	4.12324e-05
FBgn0040732	CG16926	1.3188	7.45778e-06	0.000299625										FBgn0030688	CG8952	1.19757	8.89258e-08	9.23734e-06										FBgn0003495	spz	1.19382	3.16975e-07	2.79311e-05
FBgn0286785	scb	1.31839	7.79316e-14	1.21963e-11										FBgn0032088	CG13102	1.19506	0.00200617	0.0472932										FBgn0034293	CG14495	1.19294	0.00121021	0.0328952
FBgn0030981	CG14191	1.31629	0.00158682	0.0280644										FBgn0034293	CG14495	1.18426	0.000861335	0.0247478										FBgn0022355	Tsf1	1.1897	8.53339e-09	9.83309e-07
FBgn0035439	CG14961	1.3112	0.000137423	0.00370657										FBgn0020513	Paics	1.17709	1.88693e-06	0.000135538										FBgn0036101	NijA	1.18745	1.52362e-06	0.000108685
FBgn0037562	Nazo	1.30989	0.00204391	0.0338781										FBgn0085452	CG34423	1.17401	0.000725526	0.0214887										FBgn0086708	stv	1.1843	1.55764e-07	1.5e-05
FBgn0013279	Hsp70Bc	1.30886	3.10381e-06	0.000139247										FBgn0036766	CG5506	1.17371	7.53728e-07	6.28293e-05										FBgn0262366	CG43064	1.17825	0.00125024	0.0335773
FBgn0046999	CG6429	1.3086	5.39918e-11	5.72186e-09										FBgn0263234	Phae1	1.15844	0.000582685	0.0183845										FBgn0046258	CG12880	1.17789	0.00014329	0.00578392
FBgn0036362	CG10725	1.3075	0.00095591	0.0185651										FBgn0033153	Gadd45	1.15602	2.42271e-07	2.24084e-05										FBgn0034279	CG18635	1.16877	0.00146723	0.0381875
FBgn0028418	Lk	1.30749	0.000488685	0.0106008										FBgn0040349	CG3699	1.14371	0.000943171	0.0266849										FBgn0042207	CG18530	1.16355	8.68008e-06	0.000520111
FBgn0039758	CG9737	1.30702	0.00061981	0.0129401										FBgn0001223	Hsp22	1.14064	2.08882e-05	0.00109346										FBgn0003514	sqh	1.16279	4.89739e-10	6.73741e-08
FBgn0034480	CG16898	1.30045	0.00182654	0.0310004										FBgn0032140	CG13117	1.1375	2.14228e-05	0.00110841										FBgn0263083	CG43351	1.16236	0.00099889	0.0281149
FBgn0032088	CG13102	1.29576	0.00110159	0.0208527										FBgn0035439	CG14961	1.1327	0.00103538	0.0286511										FBgn0052694	CG32694	1.1616	0.000467298	0.0159094
FBgn0033397	Cyp4p3	1.28987	1.97263e-27	1.8964e-24										FBgn0034330	CG18107	1.13197	5.71016e-05	0.00257893										FBgn0267339	p38c	1.15864	0.00010598	0.00445117
FBgn0040972	CG16978	1.2854	2.35909e-08	1.67111e-06										FBgn0002789	Mp20	1.10667	3.87572e-07	3.37663e-05										FBgn0037167	CG11425	1.15749	0.00033089	0.011833
FBgn0037819	CG14688	1.2822	2.94886e-16	6.10596e-14										FBgn0039805	Cpr100A	1.10592	0.000107327	0.00451508										FBgn0046999	CG6429	1.15626	4.48983e-07	3.81489e-05
FBgn0034664	CG4377	1.27212	0.00191092	0.0320287										FBgn0032726	CG10621	1.10509	7.84944e-05	0.00344152										FBgn0034290	CG5773	1.15298	7.15302e-07	5.77467e-05
FBgn0035360	CG1246	1.26601	0.00273673	0.0429798										FBgn0025879	Timp	1.10325	2.34619e-09	3.07602e-07										FBgn0000477	DNaseII	1.1456	3.44184e-08	3.71223e-06
FBgn0031558	CG16704	1.26235	3.74795e-06	0.000164848										FBgn0261458	capt	1.09426	2.29583e-09	3.04207e-07										FBgn0053346	CG33346	1.14511	0.000163982	0.00656026
FBgn0267012	lncRNA:CR45456	1.26018	0.000133182	0.00361391										FBgn0266889	asRNA:CR45350	1.09352	1.69645e-05	0.000916354										FBgn0034647	pirk	1.14269	0.0010521	0.0293065
FBgn0264296	CG43774	1.25651	0.00163562	0.0287012										FBgn0261560	Thor	1.08978	3.43889e-08	3.83792e-06										FBgn0035144	Kah	1.1407	1.33e-06	9.90663e-05
FBgn0031910	CG15818	1.24665	1.49268e-08	1.10384e-06										FBgn0266376	lncRNA:CR45018	1.08549	1.84099e-07	1.78854e-05										FBgn0044011	Spn43Ad	1.1343	5.02547e-05	0.00236075
FBgn0013278	Hsp70Bb	1.24326	9.31606e-08	5.99928e-06										FBgn0015035	Cyp4e3	1.08205	4.09773e-05	0.00195193										FBgn0040828	CG13306	1.13126	0.000994277	0.0280436
FBgn0010395	Itgbn	1.24186	7.90677e-09	6.04643e-07										FBgn0034396	CG15097	1.07956	3.03755e-07	2.7346e-05										FBgn0003041	pbl	1.12538	5.3739e-09	6.52711e-07
FBgn0039310	CG11878	1.23842	3.69031e-11	4.00547e-09										FBgn0000042	Act5C	1.07869	5.1176e-07	4.34642e-05										FBgn0036985	zye	1.12114	3.1984e-06	0.000214532
FBgn0063499	GstE10	1.23767	1.05786e-09	9.12679e-08										FBgn0030999	Mur18B	1.07272	0.000256836	0.00920803										FBgn0037515	Sp7	1.11823	1.72019e-07	1.61664e-05
FBgn0003041	pbl	1.23221	5.57798e-22	2.78052e-19										FBgn0042201	Nplp3	1.07216	0.00132872	0.0344396										FBgn0019929	Ser7	1.11621	9.24502e-08	9.28992e-06
FBgn0028990	Spn27A	1.22599	1.85079e-12	2.44213e-10										FBgn0029507	Tsp42Ed	1.06855	2.89718e-09	3.76188e-07										FBgn0264776	CG44014	1.11147	7.21408e-06	0.00044411
FBgn0002930	nec	1.22331	8.20063e-09	6.20069e-07										FBgn0037974	CG12224	1.0619	0.00119007	0.0317604										FBgn0036360	CG10713	1.10903	0.00137228	0.0360646
FBgn0038930	CG5778	1.22247	2.14911e-15	3.96232e-13										FBgn0286508	Had1	1.05683	0.000769658	0.0224967										FBgn0052369	CG32369	1.10876	1.28136e-07	1.27024e-05
FBgn0035094	CG9380	1.21273	6.5335e-05	0.00195845										FBgn0028381	Decay	1.05646	0.000562047	0.0178585										FBgn0028526	CG15293	1.10699	3.18307e-05	0.00158941
FBgn0031973	Spn28Dc	1.2109	5.66988e-06	0.000239219										FBgn0053258	CG33258	1.05079	1.1803e-07	1.1984e-05										FBgn0035557	CG11353	1.1064	0.000235506	0.0087468
FBgn0036945	Ssk	1.20546	6.01208e-06	0.000250516										FBgn0031089	CG9572	1.04955	0.000353569	0.0121183										FBgn0003499	sr	1.10442	2.28088e-05	0.00120591
FBgn0030993	Mec2	1.2036	1.55516e-05	0.00057345										FBgn0025558	CG4101	1.04508	5.28277e-05	0.00241009										FBgn0000527	e	1.10223	0.000903674	0.0261445
FBgn0000083	AnxB9	1.19264	4.0139e-19	1.20051e-16										FBgn0037447	Neurochondrin	1.0446	2.29777e-09	3.04207e-07										FBgn0033188	Drat	1.10127	1.00185e-06	7.58814e-05
FBgn0035918	Cdc6	1.18931	9.54808e-08	6.11941e-06										FBgn0031558	CG16704	1.04383	0.000611934	0.0190844										FBgn0038455	CG14907	1.09757	8.5822e-08	8.76554e-06
FBgn0004635	rho	1.18142	6.90197e-10	6.19291e-08										FBgn0033397	Cyp4p3	1.04143	2.42777e-10	4.09807e-08										FBgn0034294	Muc55B	1.09518	0.00190442	0.0463456
FBgn0025879	Timp	1.17379	1.71894e-19	5.78379e-17										FBgn0004635	rho	1.03904	1.00224e-06	7.96132e-05										FBgn0000042	Act5C	1.09501	8.72166e-06	0.000520289
FBgn0026196	nop5	1.17316	1.97285e-14	3.36108e-12										FBgn0040475	SH3PX1	1.03351	5.6922e-09	7.05206e-07										FBgn0264302	CG43780	1.09217	8.00767e-05	0.00350518
FBgn0266889	asRNA:CR45350	1.17159	4.25936e-07	2.31691e-05										FBgn0031561	IM33	1.02841	3.32695e-07	2.95574e-05										FBgn0264303	CG43781	1.09217	8.00221e-05	0.00350518
FBgn0042207	CG18530	1.16059	1.04305e-06	5.18024e-05										FBgn0003514	sqh	1.02548	3.82645e-07	3.35535e-05										FBgn0050273	CG30273	1.08678	0.000575501	0.0182993
FBgn0034162	CG6426	1.15863	6.34751e-15	1.15448e-12										FBgn0039301	Nup37	1.01468	0.0018083	0.0437623										FBgn0036287	CG10663	1.08632	8.45515e-07	6.62746e-05
FBgn0041711	yellow-e	1.15859	7.95592e-12	9.5606e-10										FBgn0040837	CG8620	1.01066	0.000183421	0.00697724										FBgn0035427	ckd	1.08623	0.000633283	0.0197181
FBgn0263234	Phae1	1.15779	0.00237165	0.0382275										FBgn0031472	CG2983	1.00816	3.95545e-09	4.992e-07										FBgn0037906	PGRP-LB	1.08093	9.60231e-06	0.000562862
FBgn0035501	CG1299	1.15252	2.04778e-10	2.01176e-08										FBgn0034583	CG10527	1.00807	2.17283e-08	2.4866e-06										FBgn0025866	CalpB	1.07811	6.63219e-08	6.87809e-06
FBgn0027929	NimB1	1.1472	2.69718e-05	0.000928422										FBgn0003041	pbl	1.00652	4.01191e-08	4.3691e-06										FBgn0263235	Phae2	1.07497	0.00192442	0.0467477
FBgn0037517	CG10086	1.14466	2.57352e-06	0.000117017										FBgn0262146	MtnE	1.00551	0.00168659	0.0411857										FBgn0051326	CG31326	1.07461	2.20011e-06	0.000152896
FBgn0034709	Swim	1.14356	1.83363e-19	6.01923e-17										FBgn0036945	Ssk	1.0042	8.93842e-05	0.00386873										FBgn0046687	Tre1	1.07175	1.35611e-06	9.99077e-05
FBgn0039719	CG15515	1.13949	1.54716e-05	0.00057345																								FBgn0031055	et	1.07016	0.000126615	0.00515717
FBgn0034330	CG18107	1.13131	8.10338e-06	0.000321721																								FBgn0035501	CG1299	1.0687	4.49909e-07	3.81489e-05
FBgn0033153	Gadd45	1.12673	3.40455e-08	2.34984e-06																								FBgn0040765	luna	1.06433	0.000598598	0.0189444
FBgn0286508	Had1	1.12376	3.36792e-12	4.27631e-10																								FBgn0029507	Tsp42Ed	1.05961	4.93071e-05	0.00233888
FBgn0030925	Hayan	1.12326	9.88032e-06	0.000386567																								FBgn0011674	insc	1.05895	7.96966e-05	0.00350518
FBgn0037563	CG11672	1.11724	1.86224e-08	1.33318e-06																								FBgn0034639	CG15673	1.0389	7.68963e-06	0.000471102
FBgn0015336	CG15865	1.11521	0.000392003	0.00892718																								FBgn0025631	moody	1.03535	1.70188e-05	0.000921477
FBgn0261258	rgn	1.10711	1.32253e-19	4.56408e-17																								FBgn0031037	CG14207	1.03249	4.63312e-07	3.90398e-05
FBgn0039108	CG10232	1.1042	0.00209729	0.0346348																								FBgn0000153	b	1.03243	2.74221e-06	0.00018672
FBgn0284442	Mcm3	1.1039	0.00165043	0.0288858																								FBgn0259711	CG42365	1.02952	5.20098e-06	0.000337114
FBgn0259748	CG42397	1.10342	0.00253076	0.0403095																								FBgn0034364	CG5493	1.02857	0.000190062	0.00736327
FBgn0037973	CG18547	1.09985	0.000262043	0.00630919																								FBgn0028978	trbl	1.02671	8.74164e-07	6.78652e-05
FBgn0029823	Shmt	1.09845	1.75984e-07	1.07044e-05																								FBgn0032669	CG15155	1.01841	1.90141e-07	1.74386e-05
FBgn0000042	Act5C	1.09827	3.40827e-12	4.28709e-10																								FBgn0030013	GIIIspla2	1.01673	1.47665e-05	0.000809275
FBgn0085425	CG34396	1.09017	3.27176e-17	7.86333e-15																								FBgn0041210	HDAC4	1.01033	1.4817e-07	1.43714e-05
FBgn0037447	Neurochondrin	1.08993	5.85333e-17	1.3821e-14																								FBgn0001257	ImpL2	1.00252	0.000210684	0.00791208
FBgn0029639	CG14419	1.08909	0.000841454	0.016778
FBgn0034512	CG18067	1.08807	1.35767e-06	6.50279e-05
FBgn0264549	lncRNA:CR43928	1.08293	0.00185499	0.0313253
FBgn0038455	CG14907	1.07794	1.67736e-08	1.20894e-06
FBgn0260632	dl	1.07342	7.27529e-17	1.68824e-14
FBgn0085453	Mthfs	1.07264	0.00252831	0.0403095
FBgn0030927	CG15046	1.07186	0.00216787	0.0357128
FBgn0011722	Tig	1.06192	2.04347e-12	2.6702e-10
FBgn0039629	CG11842	1.05903	1.36917e-05	0.000519088
FBgn0029507	Tsp42Ed	1.05405	4.96998e-11	5.35128e-09
FBgn0038391	GATAe	1.0522	0.00114425	0.0214791
FBgn0259708	CG42362	1.05218	1.36175e-05	0.000518101
FBgn0259709	CG42363	1.05218	1.36171e-05	0.000518101
FBgn0034724	babos	1.05092	1.14961e-13	1.7385e-11
FBgn0050026	CG30026	1.04615	6.6894e-08	4.37052e-06
FBgn0014018	Rel	1.04511	8.82582e-13	1.21211e-10
FBgn0035427	ckd	1.04265	0.000245644	0.00597852
FBgn0085261	CG34232	1.04029	0.000833908	0.0166663
FBgn0053511	CG33511	1.03507	0.00133463	0.0243729
FBgn0034396	CG15097	1.03254	5.61993e-07	2.94314e-05
FBgn0038658	CG14292	1.0323	6.81206e-16	1.32875e-13
FBgn0003062	Fib	1.02862	3.00113e-07	1.71153e-05
FBgn0031472	CG2983	1.01651	6.26856e-11	6.59129e-09
FBgn0259937	Nop60B	1.01611	2.28717e-10	2.19878e-08
FBgn0034517	Cpr57A	1.01558	4.96095e-05	0.00155027
FBgn0031040	CG14210	1.01526	0.00036298	0.00839408
FBgn0037167	CG11425	1.01116	0.000297054	0.00710134
FBgn0053258	CG33258	1.00965	6.94767e-12	8.42421e-10
FBgn0036461	Zip71B	1.00882	1.26252e-05	0.000486883
FBgn0011704	RnrS	1.0087	1.7125e-05	0.000622935
FBgn0001149	GstD1	1.00724	7.64401e-09	5.8789e-07
FBgn0028381	Decay	1.00539	0.00163171	0.02867
FBgn0261458	capt	1.00482	4.01104e-16	7.93892e-14
FBgn0028526	CG15293	1.00346	5.00343e-05	0.00155882
